# Supplementary material for: Novel Antibiotics for Multidrug-Resistant Gram-Positive Microorganisms
Source: PubMed Central journal article supplement (PMC6723731; doi:10.3390/microorganisms7080270), 2019-08-18
Supplement: microorganisms-07-00270-s001.pdf [file microorganisms-07-00270-s001.pdf]

# Supplement

Reference: National Center for Biotechnology Information. The PubChem Project. National Center for Biotechnology Information; 2019. [Available from: <https://pubchem.ncbi.nlm.nih.gov/>] [accessed 01/08/2019]

## 1. Ceftaroline

**Chemical name:** Ceftaroline

**PubChem CID:** 56841980

**Molecular Formula:** C<sub>24</sub>H<sub>25</sub>N<sub>8</sub>O<sub>10</sub>PS<sub>4</sub>

**Molecular Weight:** 744.7 g/mol

**2D Structure:**

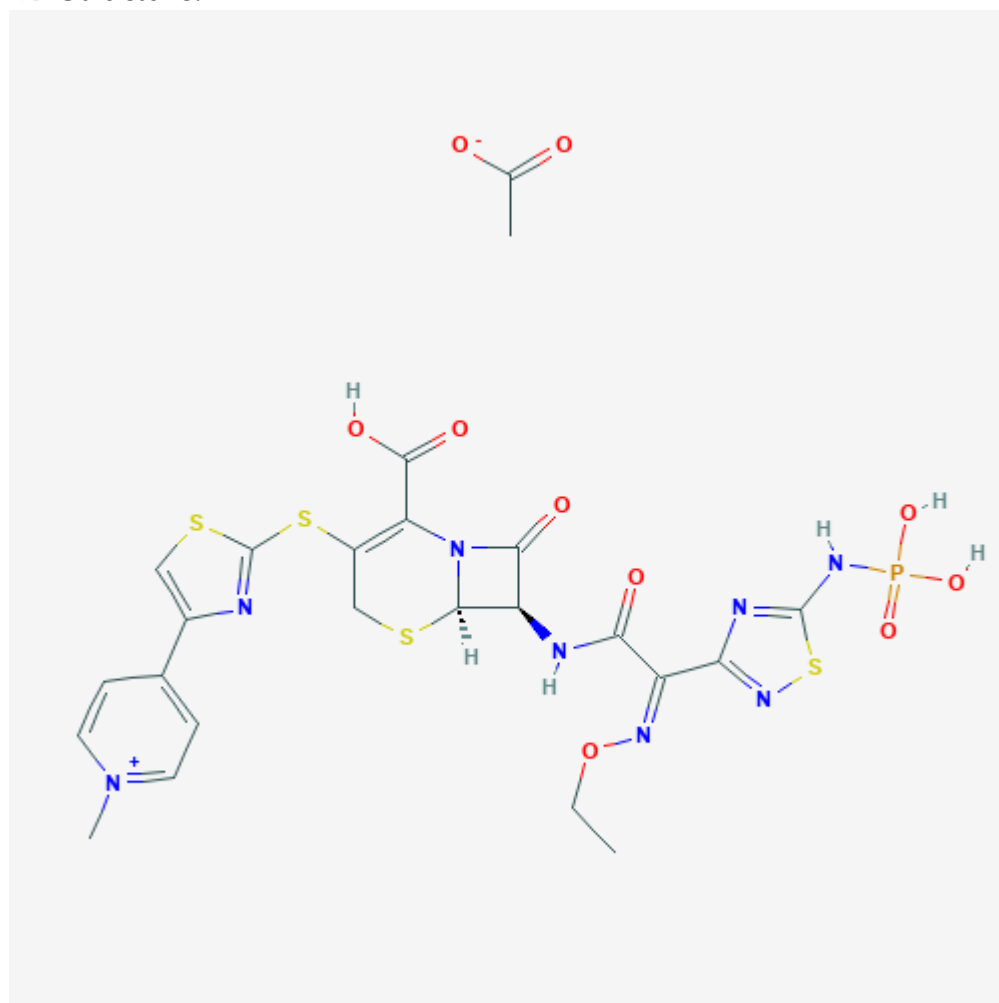

**IUPAC Name:**

(6R,7R)-7-[[[(2Z)-2-ethoxyimino-2-[5-(phosphonoamino)-1,2,4-thiadiazol-3-yl]acetyl]amino]-3-[[4-(1-methylpyridin-1-ium-4-yl)-1,3-thiazol-2-yl]sulfanyl]-8-oxo-5-thia-1-azabicyclo[4.2.0]oct-2-ene-2-carboxylic acid;acetate

## 2. Ceftobiprole

**Chemical name:** Ceftobiprole

**PubChem CID:** 135413542

**Molecular Formula:** C<sub>20</sub>H<sub>22</sub>N<sub>8</sub>O<sub>6</sub>S<sub>2</sub>

**Molecular Weight:** 534.6 g/mol

**2D Structure:**

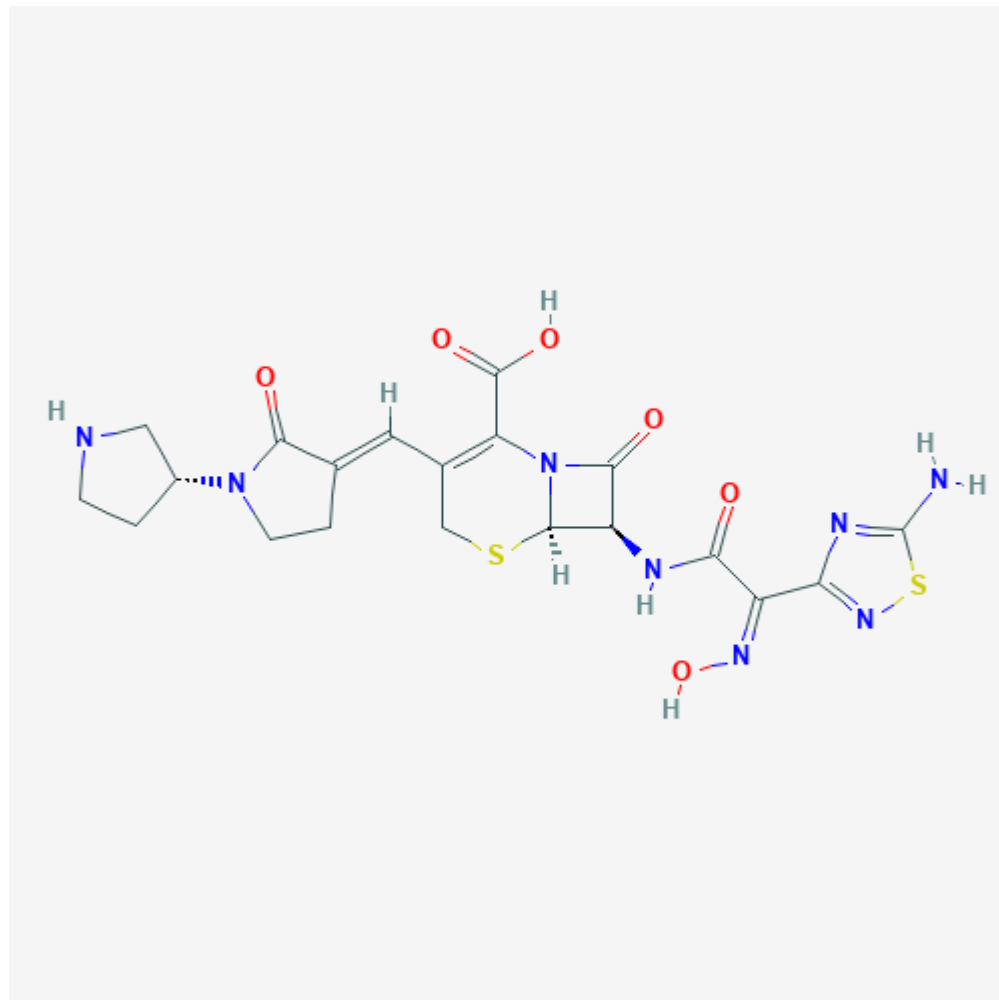

**IUPAC Name:**

(6*R*,7*R*)-7-[[*(2Z)*]-2-(5-amino-1,2,4-thiadiazol-3-yl)-2-hydroxyiminoacetyl]amino]-8-oxo-3-[[*(E)*]-[2-oxo-1-[(3*R*)-pyrrolidin-3-yl]pyrrolidin-3-ylidene]methyl]-5-thia-1-azabicyclo[4.2.0]oct-2-ene-2-carboxylic acid

### 3. Dalbavancin

**Chemical name:** Dalbavancin

**PubChem CID:** 23724878

**Molecular Formula:** C<sub>88</sub>H<sub>100</sub>Cl<sub>2</sub>N<sub>10</sub>O<sub>28</sub>

**Molecular Weight:** 1816.7 g/mol

**2D Structure:**

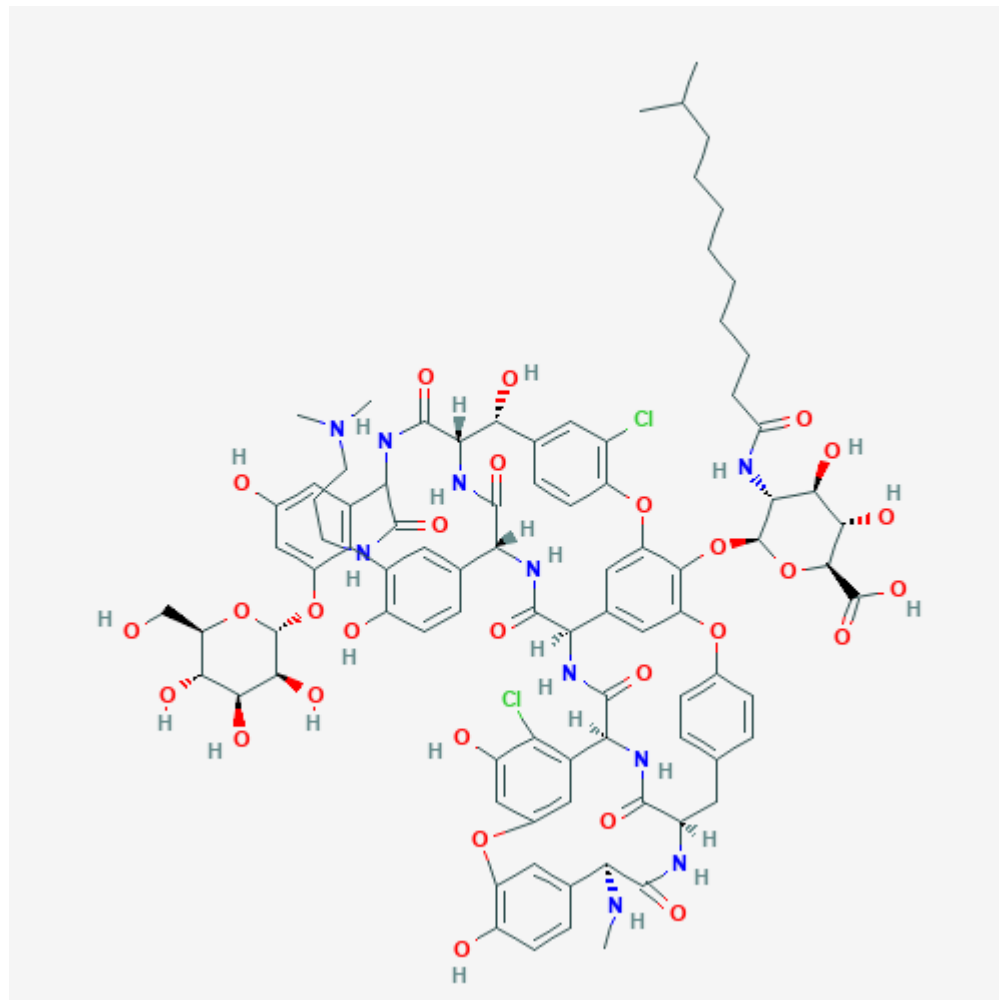

**IUPAC Name:**

(2*S*,3*S*,4*R*,5*R*,6*S*)-6-[[[(1*S*,2*R*,19*R*,22*R*,34*S*,37*R*,40*R*)-5,32-dichloro-52-[3-(dimethylamino)propylcarbamoyl]-2,26,31,44,49-pentahydroxy-22-(methylamino)-21,35,38,54,56,59-hexa-oxo-47-[(2*R*,3*S*,4*S*,5*S*,6*R*)-3,4,5-trihydroxy-6-(hydroxymethyl)oxan-2-yl]oxy-7,13,28-trioxa-20,36,39,53,55,58-hexazaundecacyclo[38.14.2.2<sup>3,6</sup>.2<sup>14,17</sup>.2<sup>19,34</sup>.1<sup>8,12</sup>.1<sup>23,27</sup>.1<sup>29,33</sup>.1<sup>41,45</sup>.0<sup>10,37</sup>.0<sup>46,51</sup>]]hexahexaconta-3,5,8,10,12(64),14(63),15,17(62),23(61),24,26,29(60),30,32,41(57),42,44,46(51),47,49,65-henicosan-64-yl]oxy]-3,4-dihydroxy-5-(10-methylundecanoylamino)oxane-2-carboxylic acid

## 4. Oritavancin

**Chemical name:** Oritavancin

**PubChem CID:** 16136912

**Molecular Formula:** C<sub>86</sub>H<sub>97</sub>Cl<sub>3</sub>N<sub>10</sub>O<sub>10</sub>

**Molecular Weight:** 1793.1 g/mol

**2D Structure:**

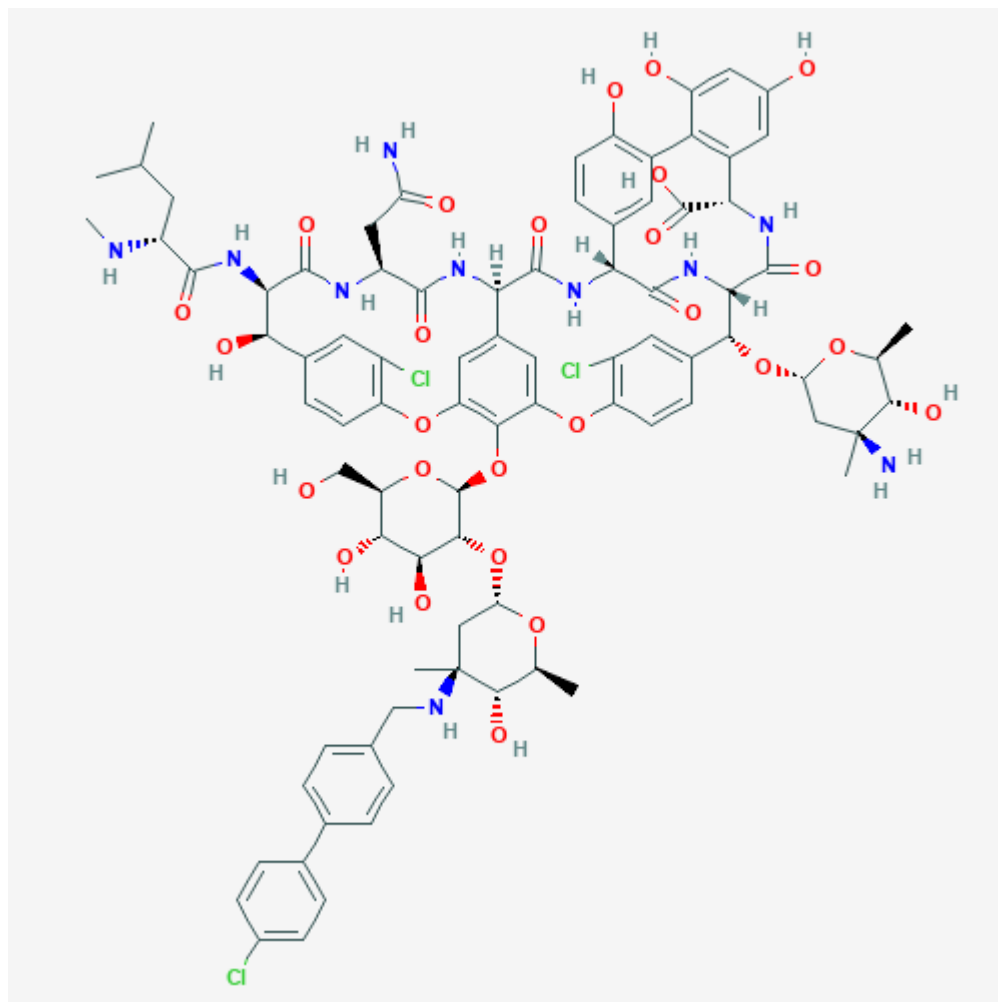

**IUPAC Name:**

(1*S*,2*R*,18*R*,19*R*,22*S*,25*R*,28*R*,40*S*)-2-[(2*R*,4*S*,5*R*,6*S*)-4-amino-5-hydroxy-4,6-dimethyloxan-2-yl]oxy-22-(2-amino-2-oxoethyl)-5,15-dichloro-48-[(2*S*,3*R*,4*S*,5*S*,6*R*)-3-[(2*S*,4*S*,5*R*,6*S*)-4-[[4-(4-chlorophenyl)phenyl]methylamino]-5-hydroxy-4,6-dimethyloxan-2-yl]oxy-4,5-dihydroxy-6-(hydroxymethyl)oxan-2-yl]oxy-18,32,35,37-tetrahydroxy-19-[[2*R*]-4-methyl-2-(methylamino)pentanoyl]amino]-20,23,26,42,44-pentaoxo-7,13-dioxa-21,24,27,41,43-pentazaocyclo[26.14.2.2<sup>3,6</sup>.2<sup>14,17</sup>.1<sup>8,12</sup>.1<sup>29,33</sup>.0<sup>10,25</sup>.0<sup>34,39</sup>]pentaconta-3,5,8,10,12(48),14,16,29(45),30,32,34(39),35,37,46,49-pentadecaene-40-carboxylic acid

## 5. Telavancin

**Chemical name:** Telavancin

**PubChem CID:** 3081362

**Molecular Formula:** C<sub>80</sub>H<sub>106</sub>Cl<sub>2</sub>N<sub>11</sub>O<sub>27</sub>P

**Molecular Weight:** 1755.6 g/mol

**2D Structure:**

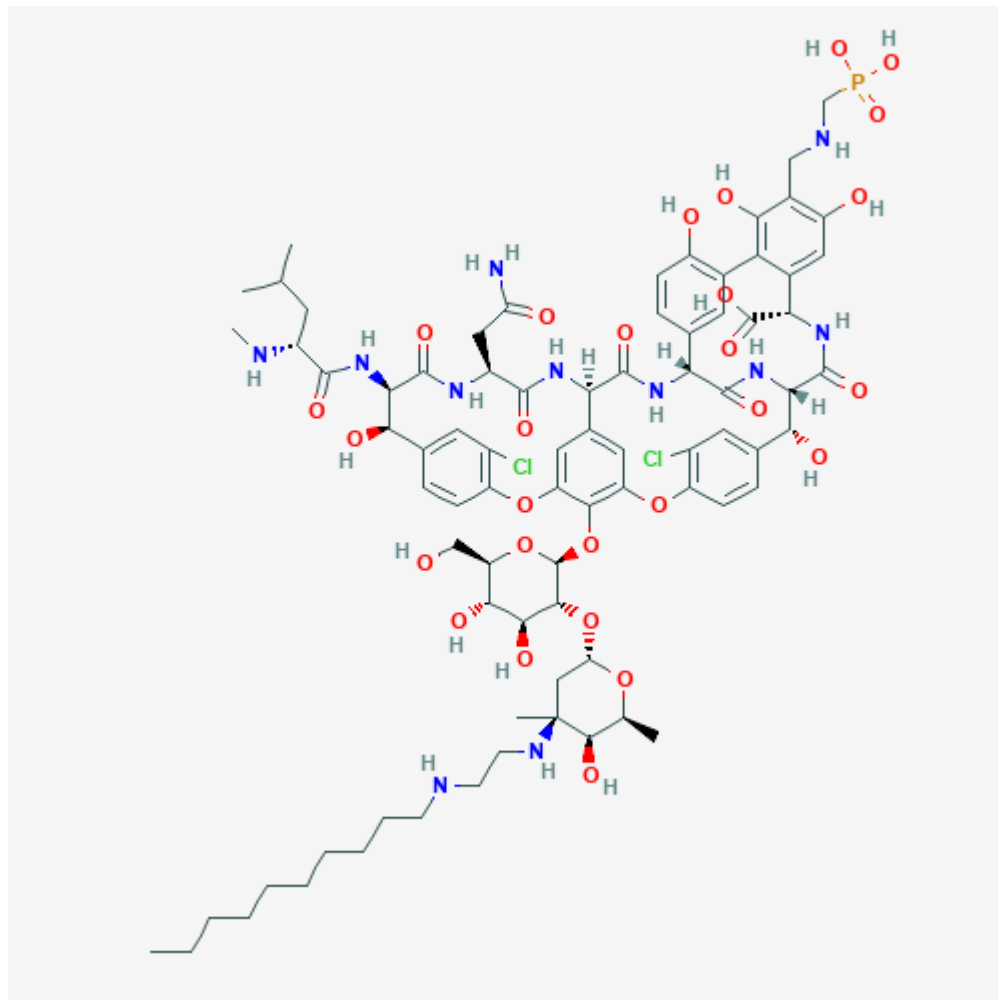

**IUPAC Name:**

(1*S*,2*R*,18*R*,19*R*,22*S*,25*R*,28*R*,40*S*)-22-(2-amino-2-oxoethyl)-5,15-dichloro-48-[(2*S*,3*R*,4*S*,5*S*,6*R*)-3-[(2*S*,4*S*,5*S*,6*S*)-4-[2-(decylamino)ethylamino]-5-hydroxy-4,6-dimethyloxan-2-yl]oxy-4,5-dihydroxy-6-(hydroxymethyl)oxan-2-yl]oxy-2,18,32,35,37-pentahydroxy-19-[[2*R*]-4-methyl-2-(methylamino)pentanoyl]amino]-20,23,26,42,44-pentaoxo-36-[(phosphonomethylamino)methyl]-7,13-dioxa-21,24,27,41,43-pentazaocyclo[26.14.2.2<sub>3,6</sub>.2<sub>14,17</sub>.1<sub>8,12</sub>.1<sub>29,33</sub>.0<sub>10,25</sub>.0<sub>34,39</sub>]pentaconta-3,5,8(48),9,11,14,16,29(45),30,32,34,36,38,46,49-pentadecaene-40-carboxylic acid

## 6. Tedizolid Phosphate

**Chemical name:** Tedizolid Phosphate

**PubChem CID:** 11476460

**Molecular Formula:** C<sub>17</sub>H<sub>16</sub>FN<sub>6</sub>O<sub>6</sub>P

**Molecular Weight:** 450.3 g/mol

**2D Structure:**

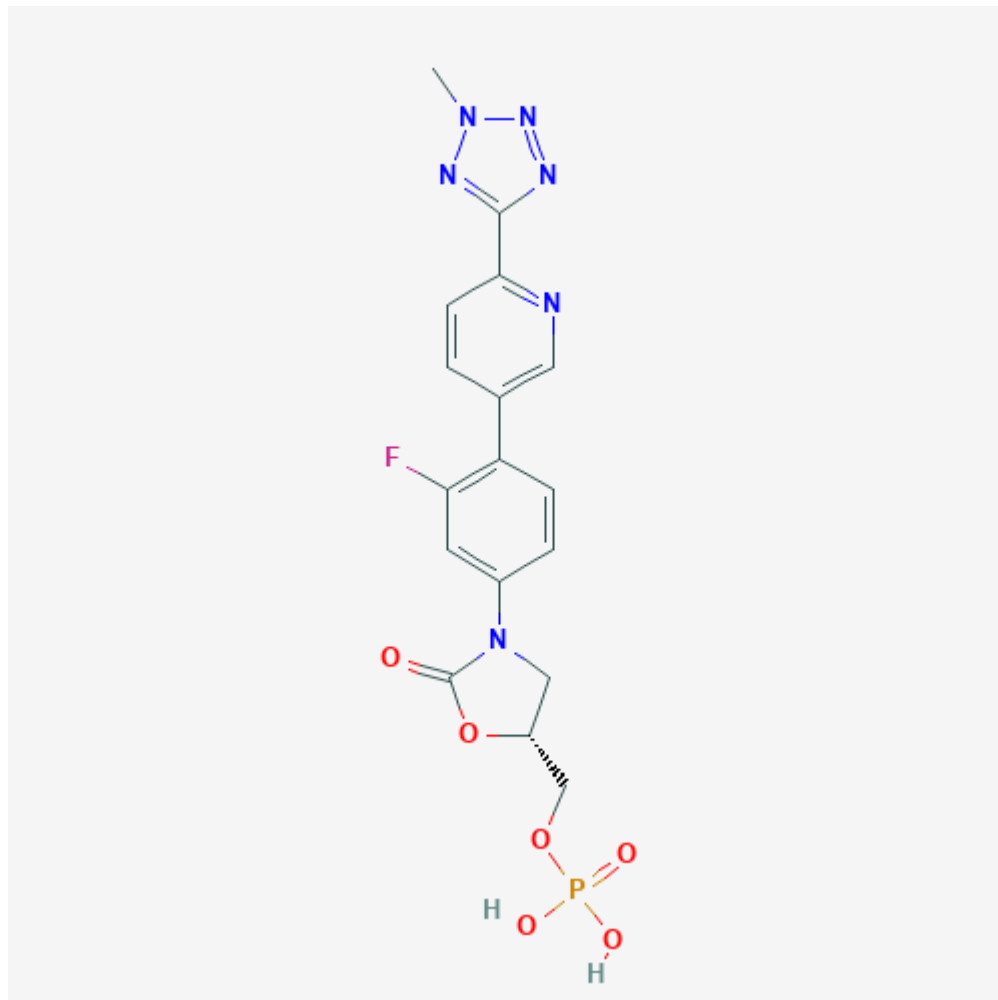

**IUPAC Name:**

[(5*R*)-3-[3-fluoro-4-[6-(2-methyltetrazol-5-yl)pyridin-3-yl]phenyl]-2-oxo-1,3-oxazolidin-5-yl]methyl dihydrogen phosphate

## 7. Besifloxacin

**Chemical name:** Besifloxacin

**PubChem CID:** 10178705

**Molecular Formula:** C<sub>19</sub>H<sub>21</sub>ClFN<sub>3</sub>O<sub>3</sub>

**Molecular Weight:** 393.8 g/mol

**2D Structure:**

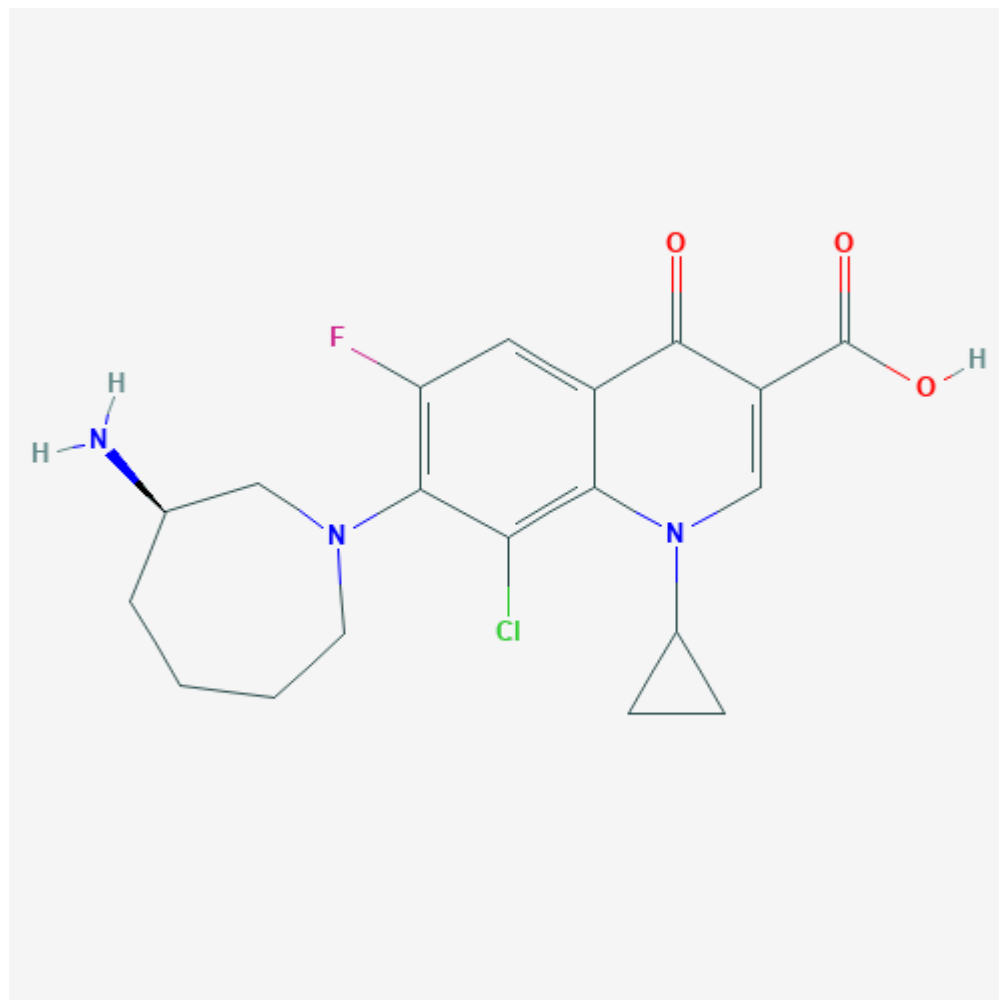

**IUPAC Name:**

7-[(3R)-3-aminoazepan-1-yl]-8-chloro-1-cyclopropyl-6-fluoro-4-oxoquinoline-3-carboxylic acid

## 8. Delafloxacin

**Chemical name:** Delafloxacin

**PubChem CID:** 487101

**Molecular Formula:** C<sub>18</sub>H<sub>12</sub>ClF<sub>3</sub>N<sub>4</sub>O<sub>4</sub>

**Molecular Weight:** 440.8 g/mol

**2D Structure:**

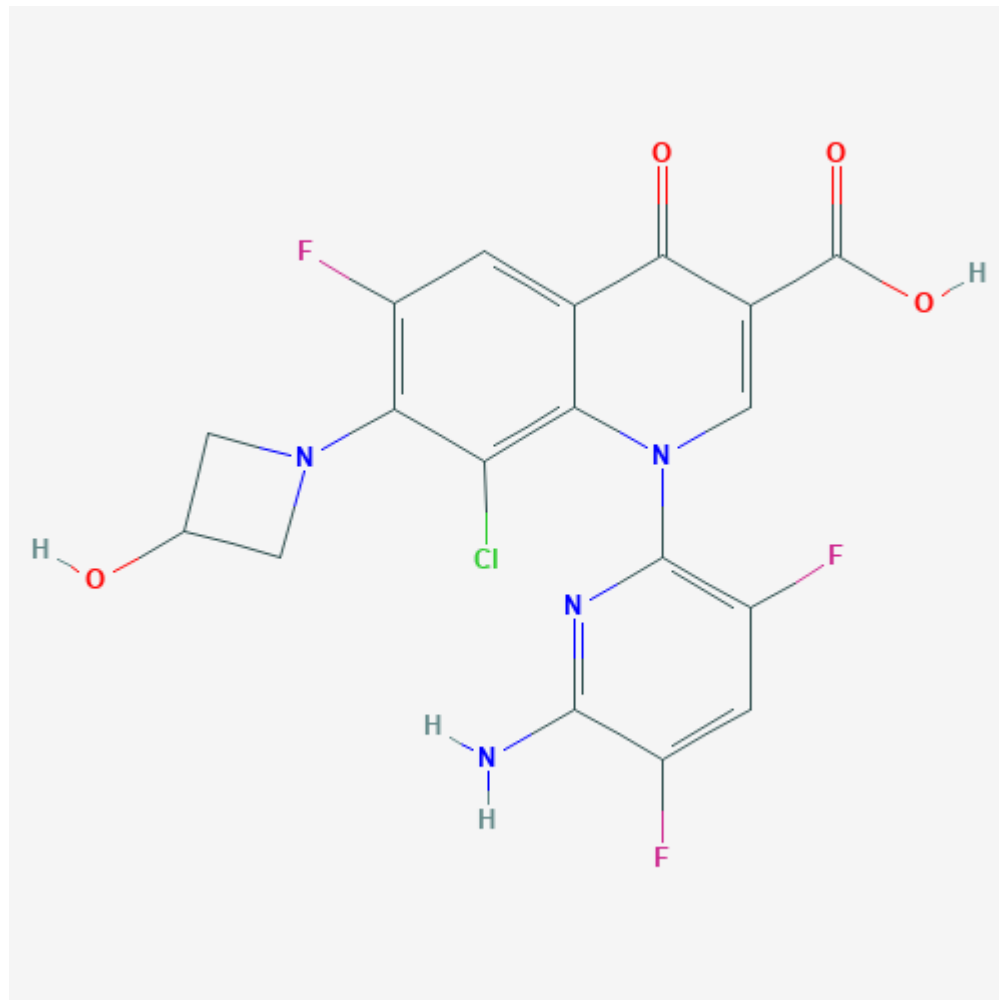

**IUPAC Name:**

1-(6-amino-3,5-difluoropyridin-2-yl)-8-chloro-6-fluoro-7-(3-hydroxyazetidin-1-yl)-4-oxoquinoline-3-carboxylic acid



## 9. Ozenoxacin

**Chemical name:** Ozenoxacin

**PubChem CID:** 9863827

**Molecular Formula:** C<sub>21</sub>H<sub>21</sub>N<sub>3</sub>O<sub>3</sub>

**Molecular Weight:** 363.4 g/mol

**2D Structure:**

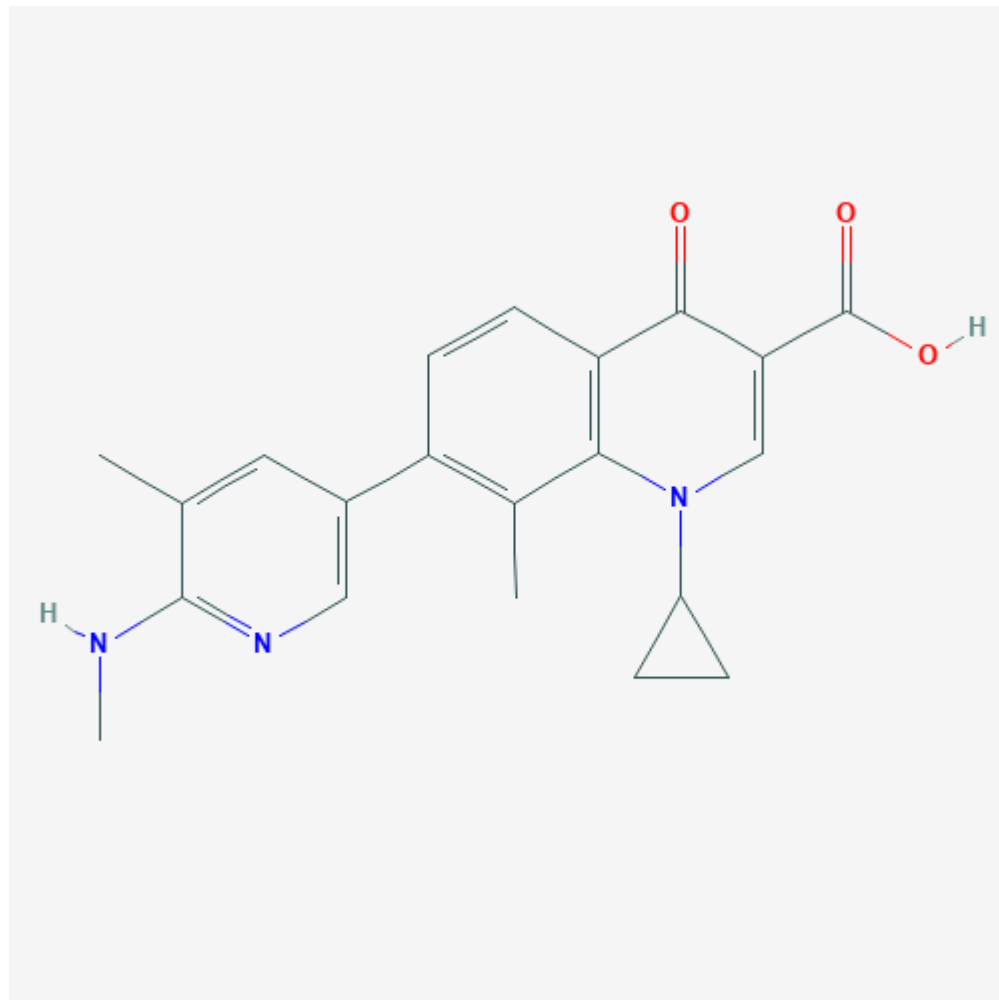

**IUPAC Name:**

1-cyclopropyl-8-methyl-7-[5-methyl-6-(methylamino)pyridin-3-yl]-4-oxoquinoline-3-carboxylic acid

## 10. Omadacycline

**Chemical name:** Omadacycline

**PubChem CID:** 54697325

**Molecular Formula:** C<sub>29</sub>H<sub>40</sub>N<sub>4</sub>O<sub>7</sub>

**Molecular Weight:** 556.6 g/mol

**2D Structure:**

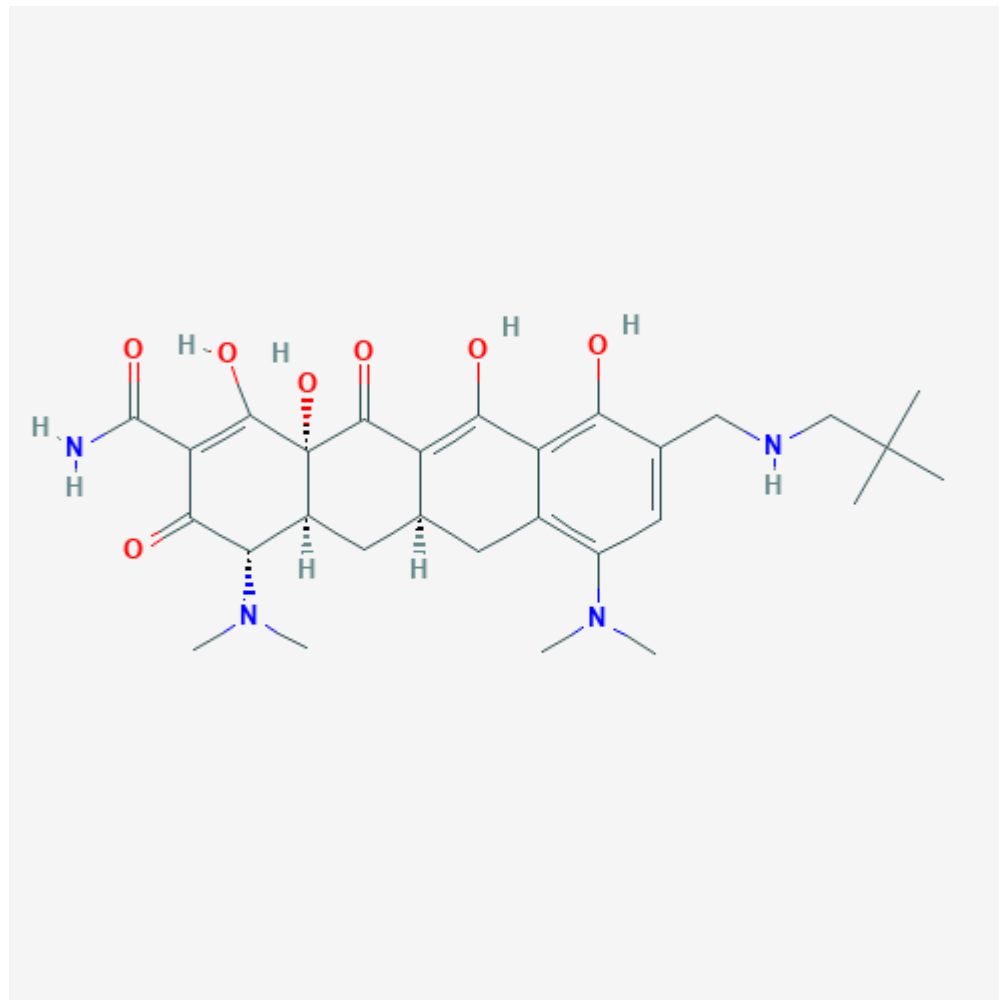

**IUPAC Name:**

(4*S*,4*aS*,5*aR*,12*aR*)-4,7-bis(dimethylamino)-9-[(2,2-dimethylpropylamino)methyl]-1,10,11,12*a*-tetrahydroxy-3,12-dioxo-4*a*,5,5*a*,6-tetrahydro-4*H*-tetracene-2-carboxamide
